# Supplementary material for: Real-time Symptom Assessment in Patients With Endometriosis: Psychometric Evaluation of an Electronic Patient-Reported Outcome Measure, Based on the Experience Sampling Method
Source: PubMed Central journal article supplement (PMC10024211; doi:10.2196/29480), 2023-03-03
Supplement: formative_v7i1e29480_app1.pdf [file formative_v7i1e29480_app1.pdf]

# Multimedia Appendix

**Table 1.** Set of questions (q) for the endometriosis specific ESM-PROM [13]

| <u>One-off questionnaire</u>                                        | Answer options                                                                                                                                                                                                                                                        |
|---------------------------------------------------------------------|-----------------------------------------------------------------------------------------------------------------------------------------------------------------------------------------------------------------------------------------------------------------------|
| <b>1. The following applies to me:</b>                              | I have regular periods, My periods are irregular, I never experience blood loss<br><br><i>* in case of regular or irregular periods, q1.1 is asked.</i><br><br><i>** in case of never experiencing blood loss, q3 (endometriosis specific symptoms) is not asked.</i> |
| <b>1.1 How many days ago did your most recent period start?</b>     | 0 t/m 31 days.                                                                                                                                                                                                                                                        |
| <u>Morning questionnaire</u>                                        |                                                                                                                                                                                                                                                                       |
| Sleep                                                               | Answer options                                                                                                                                                                                                                                                        |
| <b>1. I slept well</b>                                              | 0 (not at all)—10 (very much so)                                                                                                                                                                                                                                      |
| <b>2. I had trouble falling asleep.</b>                             | Yes – No                                                                                                                                                                                                                                                              |
| <b>3. I woke up during the night.</b>                               | Yes – No<br><br><i>* in case of “Yes”, q3.1 is asked.</i>                                                                                                                                                                                                             |
| <b>3.1 I woke up because of...</b>                                  | An urge to urinate, abdominal pain, worrying, something else/no apparent cause.                                                                                                                                                                                       |
| Sexuality                                                           | Answer options                                                                                                                                                                                                                                                        |
| <b>4. I had sexual intercourse.</b>                                 | Yes – No<br><br><i>* in case of “Yes”, q4.2 is asked.</i><br><br><i>** in case of “No”, q4.1 is asked.</i>                                                                                                                                                            |
| <b>4.1 I avoided sexual intercourse because of pain symptoms.</b>   | Yes – No                                                                                                                                                                                                                                                              |
| <b>4.2 I suffered from pain during or after sexual intercourse.</b> | 0 (no pain)—10 (a lot of pain)<br><br><i>* in case of “1 or more”, q4.3 is asked.</i>                                                                                                                                                                                 |
| <b>4.3 The pain was ...</b>                                         | Superficial vaginal pain, deep vaginal pain, abdominal pain<br><br><i>~More than one answer option possible.</i>                                                                                                                                                      |
| <u>Momentary assessment</u>                                         |                                                                                                                                                                                                                                                                       |
| Endometriosis specific symptoms                                     | Answer options                                                                                                                                                                                                                                                        |
| <b>1. I suffer from abdominal/pelvic pain</b>                       | 0 (no pain)—10 (a lot of pain)<br><br><i>* in case of “1 or more”, q1.1 is asked.</i>                                                                                                                                                                                 |

1.1 I feel this pain in the following place(s) in my abdomen:

0 – 9

R L

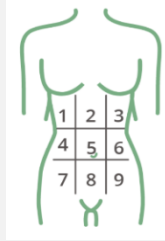

2. I suffer from pain in my...

Shoulders, groins, back, anus, legs, other area, none of the above.

~More than one answer option possible.

2.1 I feel pain when I am...

Walking, sitting, standing, laying down.

~More than one answer option possible

3. The vaginal blood loss is as follows:

No bleeding, spotting, light bleeding, moderate bleeding, heavy bleeding.

4. I feel...

Cold (-5) – neutral (0) – very hot/hot flushes(+5)

5. Since the last questionnaire I have urinated...

0 times, once, twice, 3 times, 4 times, > 4 times.

\* In case of "once or more", q5.1 is asked.

5.1 When urinating I experienced the following symptoms:

Pain while passing urine, strong urge to urinate, blood loss while passing urine, difficulty passing urine, no symptoms.

\* In case of "strong urge to urinate", q5.2 is asked.

~More than one answer option possible

5.2 How strong was the urge to urinate.

I could put it off for 30 minutes, I could put it off for 10 minutes, I had to urinate instantly/I could not put it off any longer.

6. I feel discomfort due to being bloated

0(not at all) – 10(very much so)

7. My stomach is distended (swollen).

0(not at all) – 10(very much so)

8. I feel an urge to defecate.

0(not at all) – 10(very much so)

9. Since the last questionnaire I have had... bowel movements.

0, 1, 2, 3, 4, 5, >5

\*In case of "1 or more", q9.1 is asked.

9.1 The appearance of my stools was as follows:

Bristol Stool Form Scale

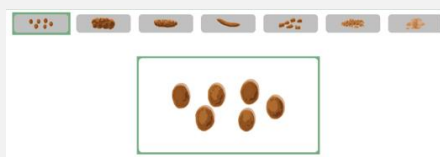

9.2 My bowel movements are painful

0(not at all) – 10(very much so)

|                                                                 |                                                                                                                                                                                                                                                     |
|-----------------------------------------------------------------|-----------------------------------------------------------------------------------------------------------------------------------------------------------------------------------------------------------------------------------------------------|
| <b>9.3 I have rectal bleeding/blood loss.</b>                   | 0 (not at all)—10 (very much so)                                                                                                                                                                                                                    |
| <b>General somatic symptoms</b>                                 | <b>Answer options</b>                                                                                                                                                                                                                               |
| <b>10. I feel dizzy.</b>                                        | 0 (not at all)—10 (very much so)                                                                                                                                                                                                                    |
| <b>11. I feel nauseous.</b>                                     | 0 (not at all)—10 (very much so)                                                                                                                                                                                                                    |
| <b>12. I have a headache.</b>                                   | 0 (not at all)—10 (very much so)                                                                                                                                                                                                                    |
| <b>13. I feel short of breath.</b>                              | 0 (not at all)—10 (very much so)                                                                                                                                                                                                                    |
| <b>14. I have sore muscles and/or joints.</b>                   | 0 (not at all)—10 (very much so)                                                                                                                                                                                                                    |
| <b>15. I feel...</b>                                            | -5 (very tired) – 0 (neutral) – +5 (full of energy)                                                                                                                                                                                                 |
| <b>16. I feel well physically.</b>                              | 0 (not at all)—10 (very much so)                                                                                                                                                                                                                    |
| <b>Mood and psychological factors</b>                           | <b>Answer options</b>                                                                                                                                                                                                                               |
| <b>17. I feel happy.</b>                                        | 0 (not at all)—10 (very much so)                                                                                                                                                                                                                    |
| <b>18. I feel sad (down).</b>                                   | 0 (not at all)—10 (very much so)                                                                                                                                                                                                                    |
| <b>19. I feel emotional.</b>                                    | 0 (not at all)—10 (very much so)                                                                                                                                                                                                                    |
| <b>20. I feel stressed.</b>                                     | 0 (not at all)—10 (very much so)                                                                                                                                                                                                                    |
| <b>21. I feel relaxed.</b>                                      | 0 (not at all)—10 (very much so)                                                                                                                                                                                                                    |
| <b>22. I am worried.</b>                                        | 0 (not at all)—10 (very much so)                                                                                                                                                                                                                    |
| <b>23. I feel irritable.</b>                                    | 0 (not at all)—10 (very much so)                                                                                                                                                                                                                    |
| <b>Social and contextual factors</b>                            | <b>Answer options</b>                                                                                                                                                                                                                               |
| <b>24. My current situation is as follows:</b>                  | I am at home, I am at someone else's home, I am at work/school, I am in a public place, I am on the move, I am somewhere else.                                                                                                                      |
| <b>25. Just before the questionnaire I was...</b>               | Resting, at work/school, doing household chores/grocery shopping, taking care of children/providing other informal care, eating/drinking, relaxing/spending time on a hobby, exercising/participating in sports, on the move, doing something else. |
| <b>26. I feel uneasy/easy in this situation.</b>                | -5 (very uneasy) – 5 (very easy)                                                                                                                                                                                                                    |
| <b>27. My symptoms are getting in the way of my activities.</b> | 0 (not at all)—10 (very much so)<br><i>* In case of "1 or more", q27.1 is asked.</i>                                                                                                                                                                |
| <b>27.1 My symptoms are negatively affecting my...</b>          | Household chores, sports/hobbies, work, social activities.<br><i>~More than one answer option possible.</i>                                                                                                                                         |

**28. I am currently in the company of...** My partner, children, friends, housemates, co-workers, relatives (who are not part of my household), acquaintances, people I don't know/others, a big group, one or more pets, no one.

*\* In case "no one" is NOT answered, q28.1 is asked.*

**28.1 I feel uneasy/easy in this company.** -5 (very uneasy) – 5 (very easy)

**29. I feel that I need to rest.** 0 (not at all)—10 (very much so)

**Use of nutrition and medication** **Answer options**

**30. Since the last questionnaire I have eaten...** Breakfast, lunch, dinner, a snack/fruit, nothing

**31. Since the last questionnaire I have taken/had...** Caffeine (coffee), nicotine (smoking), alcohol, recreational drugs, painkillers, none of the above.

*\* In case of "alcohol", q31.1 is asked.*

*\*\* In case of "painkillers", q31.2 and q31.3 are asked.*

**31.1 Since the last questionnaire I have had ... units of alcohol.** 0-2, 3-4, > 4

**31.2 Since the last questionnaire I have used painkillers for...** Abdominal pain and/or pelvic pain, something else.

**31.3 Since the last questionnaire I have used the following painkiller ...** Paracetamol, an NSAID (ibuprofen, Nurofen, aspirin, mefenamic acid), tramadol/Zaldiar, an opioid (e.g. morphine), homoeopathic preparations, CBD oil (cannabis oil)/ hashish/ THC.
